# Supplementary material
Source: PubMed Central journal article supplement (PMC6589677)
Supplement: pnas.1900083116.sapp.pdf [file pnas.1900083116.sapp.pdf]

1 **Supplementary Information**

2 Supplementary Figure 1: Detection of TrkA in trout OO but not OB or head-kidney (HK) tissues.

3 (A) Detection of TrkA in trout OO but not HK or OB lysates by immunoblotting. Immunoblots  
4 detecting TrkA showed a ~130 KDa band in OO lysates. Isotype control consisted of blots  
5 incubated with normal rabbit IgG. Immunoblot is representative of two independent experiments.

6 (B) Immunofluorescence staining of control rainbow trout HK cryosection stained with anti-TrkA  
7 antibody (FITC, green) confirming absence of TrkA<sup>+</sup> cells in this tissue. Cell nuclei were stained  
8 with DAPI DNA stain (blue). Scale bar: 20 μm.

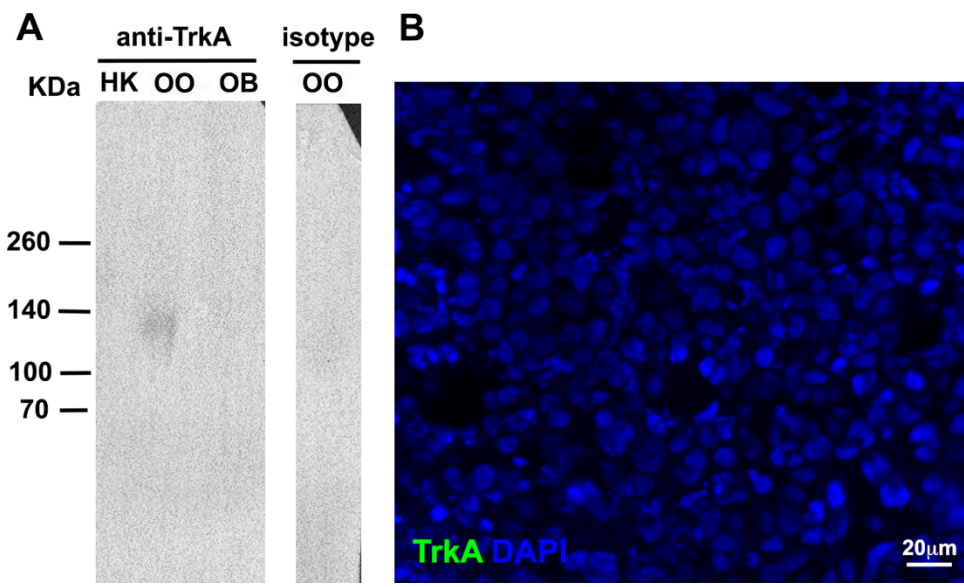

9  
10  
11  
12  
13  
14  
15  
16  
17

18 Supplementary Figure 2: (A) Rainbow trout (N=3) received 30  $\mu$ l of PBS containing 50  $\mu$ g of poly  
 19 (I:C) (Sigma) in each nare. Fish were sampled 4 h later and OO frozen sections stained with anti-  
 20 caspase 3 antibody (magenta). Cell nuclei are stained with DAPI (blue). Scale bar: 20  $\mu$ m. (B) *In*  
 21 *vivo* inhibition of caspase 3 by treatment with Z-DEV-FMK inhibits IHNV-induced caspase 3  
 22 staining in trout OO. Representative trout OO cryosection stained with anti-caspase 3 antibody  
 23 (magenta). Cell nuclei are stained with DAPI (blue). Scale bar: 50  $\mu$ m. (C) *In vivo* blocking of  
 24 TrkA by treatment with AG879 inhibits IHNV-induced caspase 3 staining in trout OO.  
 25 Representative trout OO cryosection stained with anti-caspase 3 antibody (magenta). Cell nuclei  
 26 are stained with DAPI (blue). Scale bar: 50  $\mu$ m. (D-F) Immunofluorescence staining of a control  
 27 (D) IHNV only (E) and AG879+IHNV (F) trout OO cryosection stained with anti-CD8 $\alpha$  (FITC,  
 28 green). Scale bar, 10  $\mu$ m. Cell nuclei were stained with DAPI DNA stain. L, lumen; LP, lamina  
 29 propria.

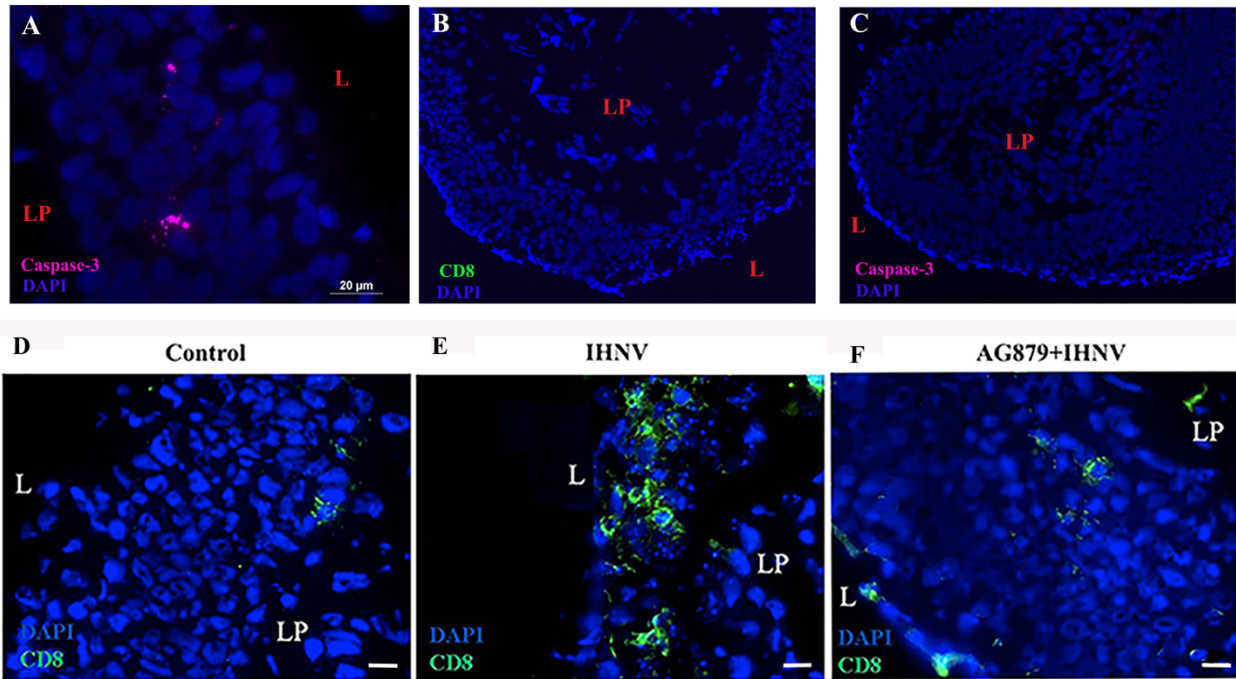

30  
 31  
 32  
 33  
 34

35 Supplementary Figure 3: IHNV activates sensory neurons in the OO *in vitro*. (A) Representative  
 36 dot plots of control (left) and IHNV (right) trout OO extracted cells stained with anti-pERK  
 37 antibody showing the mean percentage of positive cells from the neuronal cell gate. (B)  
 38 Quantification of flow cytometry data in (A) indicating a significant increase in the percentage of  
 39 pERK<sup>+</sup> cells 15 min after adding IHNV (multiplicity of infection 1:3) *in vitro*. Results are  
 40 representative of three independent experiments (N = 5). \*p < 0.05. (C) Immunoblots of control  
 41 and IHNV treated trout OO and OB (15 min intranasal *in vivo* treatment) showing the increased  
 42 expression of pERK in IHNV-treated compared to control tissues. Negative control consisted in  
 43 IHNV treated tissue lysates probed with rabbit IgG isotype control as primary antibody. (D)  
 44 Quantification of immunoblot images shown in C). Data are shown as the relative expression of  
 45 pERK using Image Lab analysis software.

46

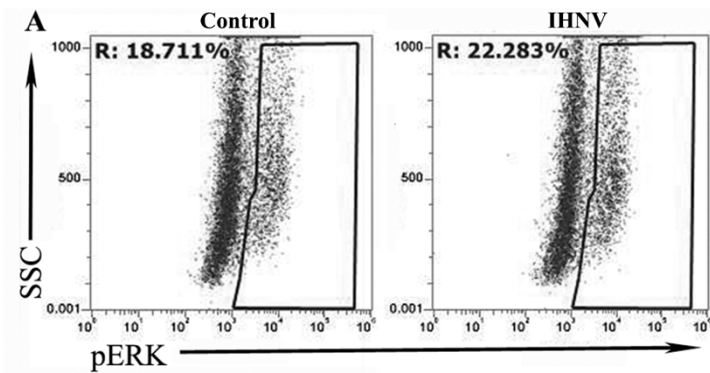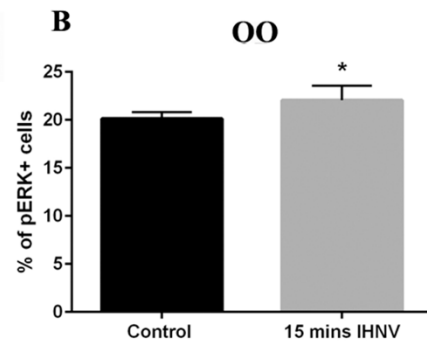

47

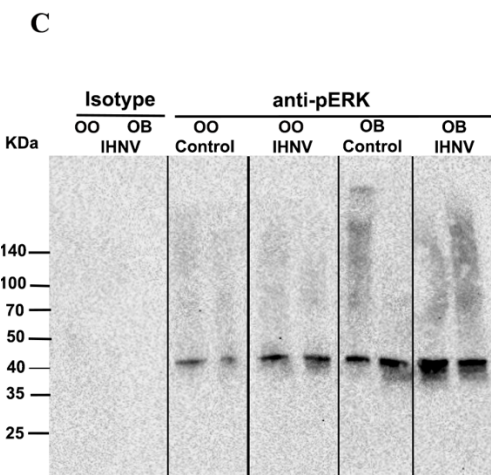

**D**

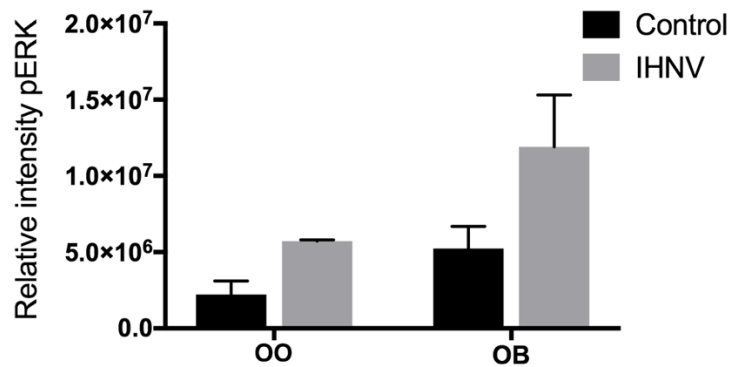

48

49

50 Supplementary Figure 4: Nasal delivery of IHNV does not result in presence of virus in the OB  
51 and does not alter blood brain barrier integrity 15 min after delivery. **(A)** Immunofluorescence  
52 staining with anti-IHNV Abs (Cy3, red) showing no IHNV staining in the OO of control rainbow  
53 trout. **(B)** Immunofluorescence staining with anti-IHNV Abs (Cy3, red) showing the presence of  
54 IHNV (white arrows) in the OO of IHNV treated rainbow trout 15 min after nasal delivery. **(C)**  
55 Immunofluorescence staining with anti-IHNV Abs (Cy3, red) showing no detection of IHNV at  
56 OB of control rainbow trout. **(D)** Immunofluorescence staining with anti-IHNV Abs (Cy3, red)  
57 showing the absence of IHNV in the OB of IHNV treated rainbow trout 15 min after nasal delivery.  
58 **(E)** Ct values for IHNV N protein gene expression by RT-qPCR of total viral vaccine (positive  
59 control), virus-free supernatant, OB of PBS-treated trout and OB of IHNV treated rainbow trout.  
60 N.D: not detected. IHNV positive control consisted of Scale bar, 20  $\mu\text{m}$ . **(F-I)** Differential  
61 interference contrast (DIC) images merged with FITC (green) fluorescence image of trout OB  
62 cryosections following intravenous injection of FITC- conjugated dextran. No changes in the BBB  
63 integrity of PBS-treated fish **(F & H)** or IHNV-treated fish **(G & I)** were observed as demonstrated  
64 by the absence of FITC leakage into the OB. Scale bar: 100  $\mu\text{m}$ .

65

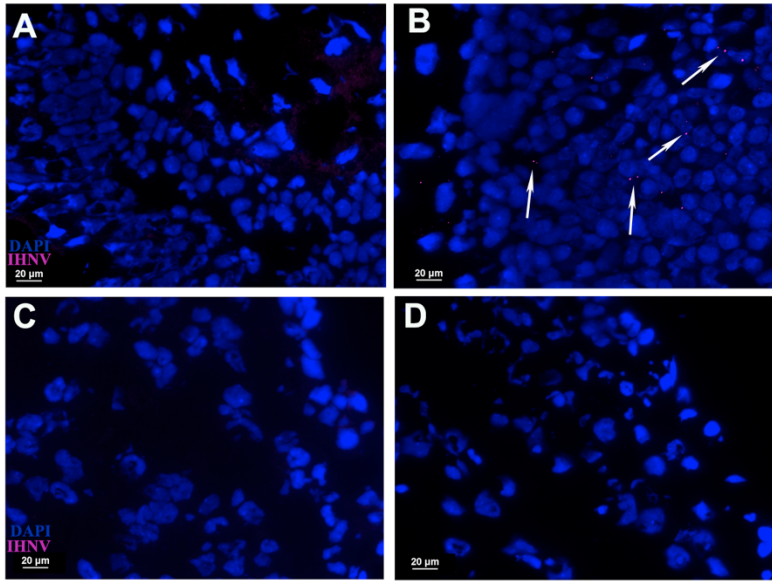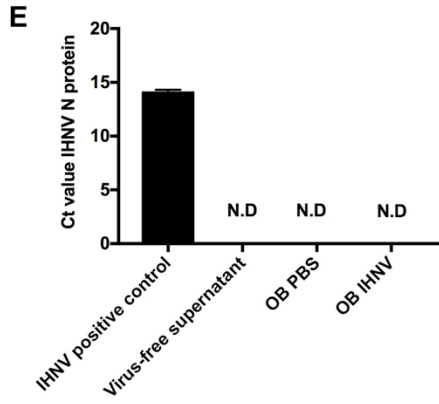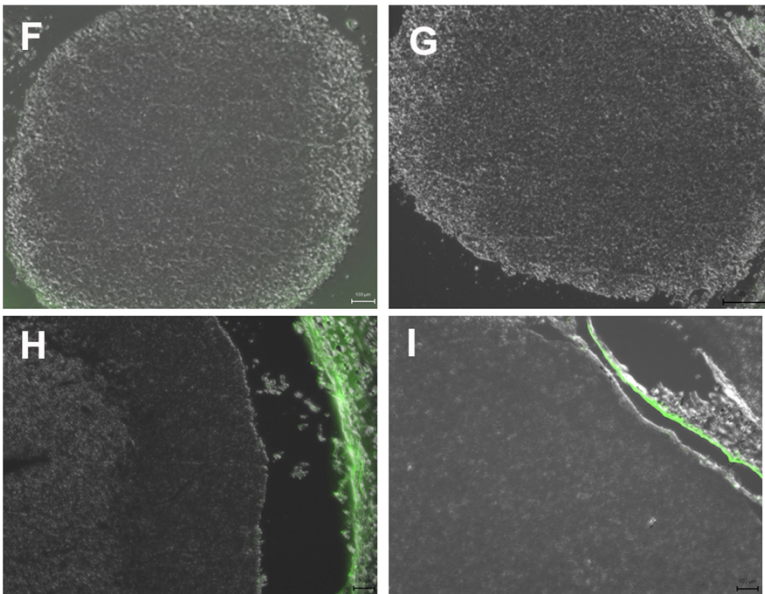



67

68

69 Supplementary Figure 5: Leukocyte recruitment occurs as early as 15 min after IHNV delivery as  
70 visualized by enlargement lamina propria (LP) of the olfactory lamellae of IHNV-treated  
71 compared to control fish. (A) Immunofluorescence staining of control (left) and IHNV-treated  
72 (right) rainbow trout OO stained with anti-trout TrkA (FITC, green) showing our image analysis  
73 strategy and the enlargement in the apical and medial regions of the LP in the IHNV-treated fish.  
74 Cell nuclei were stained with DAPI DNA stain (blue). Results are representative of two different  
75 experiments (N = 3). Scale bar, 20  $\mu$ m. (B) The width of LP at the apical (100  $\mu$ m from the lamellar  
76 tip, red line) and lateral (250  $\mu$ m from the lamellar tip, yellow line) regions of the olfactory lamella  
77 were measured by image analysis of 10 individual lamellae from three different fish per treatment.  
78 The mean distance  $\pm$  SE is shown. (C) Representative hematoxylin-eosin stain of adult rainbow  
79 trout olfactory organ showing that leukocyte recruitment occurs as early as 15 min after IHNV  
80 delivery in the olfactory lamellae of IHNV-treated (middle and right) compared to control fish  
81 (left). L, lumen; LP, lamina propria. Scale bar: 50  $\mu$ m.

82

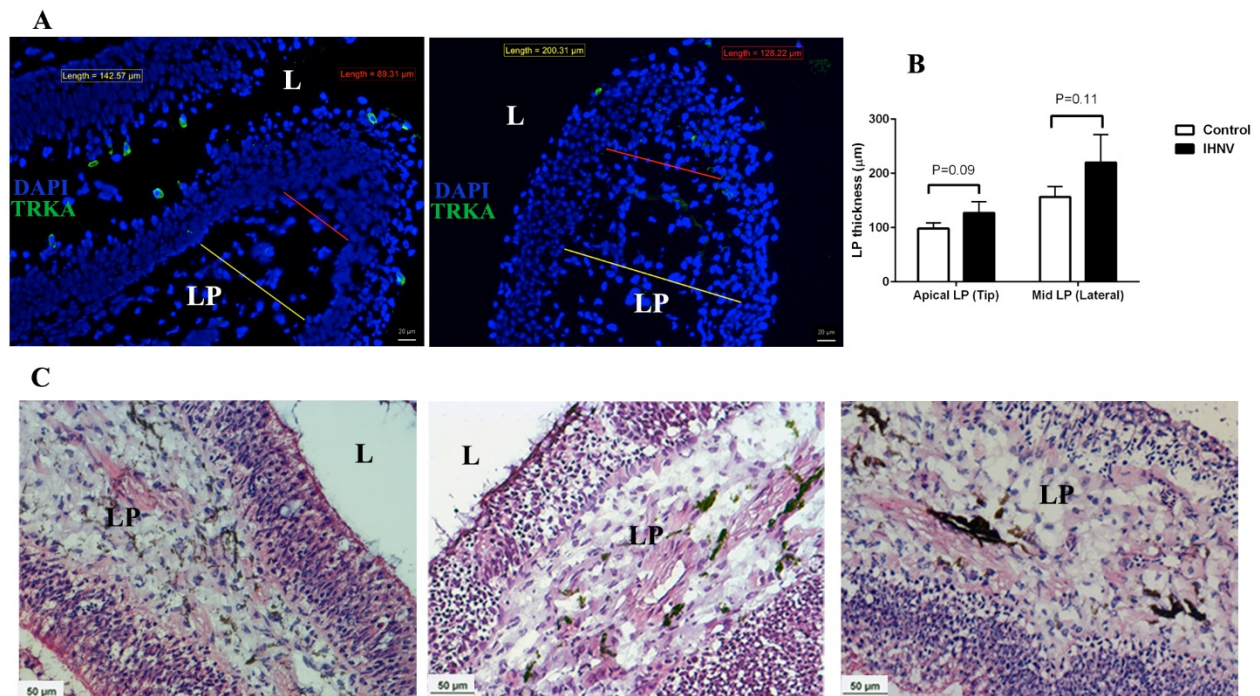

83

84

85 Supplementary Figure 6: A low degree of amino acid conservation between IHNV G protein and  
 86 HSV secreted G protein and generation of recombinant IHNV G protein. (A) Amino acid sequence  
 87 alignment of HSV-2 sG protein (accession number GD\_HHV23) and trout IHNV G protein  
 88 (sequenced obtained from the live attenuated IHNV used in this study) performed in CLUSTALW  
 89 showing a low degree of amino acid conservation. (B) Production of recombinant FLAG-tagged  
 90 IHNV G protein by mammalian expression system. Immunoblot using anti-FLAG antibody  
 91 confirmed the presence of the recombinant protein (IHNV G protein) band at expected (~50 KDa)  
 92 molecular weight.

93

### A

```

HSV-2 sG      -----MGRLTSGVG--TAALLVAVGLRWCAKYLADPPLKMD
IHNV G      MDTTITTLILILITCGANSQIVNEDTVSESDQPTWSNPLFTYPEGCTLD
              : : * . . * . . * : : : : : * . *
HSV-2 sG      FNRFRGKQLFVLDRLID-----PPGVKRVYHIQPSLEDFQPPSIP
IHNV G      KLSKVNASQLRCFRIFDDENRGLIAYFTSIRASLAVGNLGEIHIQGTHIH
              . . . * * . . . : : * * * *
HSV-2 sG      ITVYVAVLER-----ACRSVLLHAPSEAPQIVRGASDEARKHTYNLTI
IHNV G      KVLRYTICSTGFFGGQIEKALVEMKLSKEAGAVDTITTAALYFPAPRC
              . : * : : . : : * : : : * :
HSV-2 sG      AWYR---MGDNCAIPIIVMEYTECFYN-----KSLGVCFIR-IQPRWS
IHNV G      QWYTDNVQNDLIFYTYIPKSVLRDFYTRDFLSDSDFIGGKCTKSPCQTHWS
              ** . * . * . * . * . * . * . * . * . * . *
HSV-2 sG      -----YDSFSAVSEINLGFIMHAPAFETAGT
IHNV G      NVVVMGDAGIFACDSSQEIKGHLFVDKI SNRVVKATSYGHHWGLHQACM
              : * : * . . : : * . . . *
HSV-2 sG      YLRVVKINDWTEITQFILEHRRARASCKYALPLRIPPAACLTISKAYQQGVT
IHNV G      IEF CGGQWIRIDLGLLISVVYNSGSKILSFPKCEDKIVMGRGNLDDFAYL
              * : : * * . * : : * . : : : : .
HSV-2 sG      VDSIGMLER-----FIPENQRTVALYSLKTAGNHWGPKPPYTSTLLPEL
IHNV G      DDLVKASESREECLEAHAEIISINSVTPYLLSKFRSPHGINVVYAMKKG
              * : . * * * : : . : : : * * . . . :
HSV-2 sG      SDITNATQPELVFEDPEDSALLEDPAGT-----
IHNV G      SIYHGCMIVAVDEVSKDRITTYRAHRATSFIKWERPFQDEWGFHGLHGN
              * . . * * . * : : . *
HSV-2 sG      -----VSSQIPNWHIPSIQDVAPHHAPAPSNPGLIIGALAGST
IHNV G      NNTIIPDLEKYVAQYKTSMMEMPSIKSVFHPHSLALALYNETDVSGISIRKL
              : * . . * . * . * : * * : * .
HSV-2 sG      -----LAVLVIGGIAFWRRRAQMAKRLRLPHRDD--DAP
IHNV G      DSFDLQSLHWSFWPTISITLGGIPFVLLLAVAAYCCNSGRPPTPSAPQSIP
              : : . * * . * : . * . . . *
HSV-2 sG      PSHQPLFY
IHNV G      IYHLANRS
              * .

```

### B

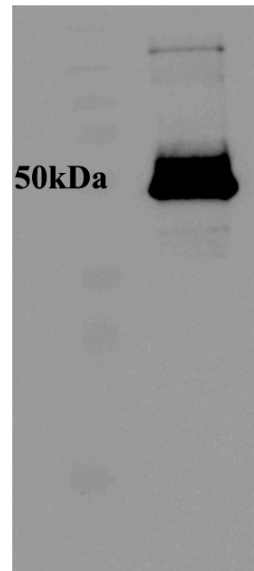

102

103

104

105

106 Supplementary Figure 7: The interaction between viral glycoprotein (G protein) and crypt neuron  
107 TrkA is necessary for inducing crypt neuron-mediated nasal immune responses in trout. **(A)**  
108 Multiple sequence alignment (performed with CLUSTALW <http://align.genome.jp/>) of rainbow  
109 trout (Accession number: XP\_021415297.1), mouse (Accession number: NP\_001028296.1) and  
110 human (Accession number: EAW52902.1) TrkA domain 5 (domain known to interact with cognate  
111 ligand) showing conservation of aa at sites previously described to be critical for NGF binding to  
112 TrkA. **(B)** Nasal delivery of recombinant IHNV G protein recapitulates IHNV-induced changes in  
113 crypt neurons and CD8 T cell immune responses. Immunofluorescence staining of trout olfactory  
114 organs 15 min after receiving PBS or 100 ng of recombinant FLAG-tagged IHNV G protein  
115 intranasally stained with anti-TrkA (FITC, green), anti-FLAG (Cy3, magenta) and DAPI (blue)  
116 showing the co-localization of TrkA and IHNV G protein in the FLAG-tagged IHNV G protein  
117 delivered group but not controls. **(C)** Quantification of the mean number of TrkA<sup>+</sup> crypt neurons  
118 in the OO of control trout and trout that received recombinant FLAG-tagged IHNV G protein IN  
119 (N = 3). **(D)** Quantification of the mean number of CD8 $\alpha$ <sup>+</sup> T cells in control and FLAG-tagged  
120 IHNV G protein treated rainbow trout OO (N = 3) by immunofluorescence microscopy. **(E)** *In*  
121 *vivo* antibody blocking of IHNV G protein reverts IHNV-induced changes in crypt neurons and  
122 CD8 T cell immune responses. Live attenuated IHNV was incubated with anti-IHNV G protein  
123 monoclonal antibody, anti-IHNV N protein monoclonal antibody or not treated for 30 min at RT  
124 prior to *in vivo* nasal delivery. Quantification of the mean number of TrkA<sup>+</sup> crypt neurons by  
125 immunofluorescence microscopy in control, anti-G protein antibody treated + IHNV, anti-N  
126 protein antibody treated IHNV and IHNV alone in the OO of rainbow trout (N = 3). **(F)**  
127 Quantification of the mean number of CD8 $\alpha$ <sup>+</sup> T cells by immunofluorescence microscopy in the  
128 OO of control, anti-G protein antibody treated + IHNV, anti-N protein antibody treated IHNV and  
129 IHNV-treated rainbow trout (N = 3). Results are representative of two independent experiments  
130 (N = 3). One-way ANOVA and a Tukey post hoc analysis test were performed to identify  
131 statistically significant differences among groups. \*p < 0.05, \*\*p < 0.01.



**A**

TrkA trout TKVQEGGNLTFVQVTVGPMFVVRWRTNKLKLSRYTVQERFWGSTLELELQ  
 TrkA mouse DSVEVGGDDVFLQCQVEGLALQADWILTELEGAATVKK--FGDLPSLGLI  
 TrkA human ASVDVGGDDVLLRCQVEGRGLEQAGWILTELEQSATVMK--SGGLPSLGLT  
 .\*: \*::: : \* \* \* \* : . \* . : \* \* \* \* : \* . \* \* \*

TrkA trout LWNMSSEDLNHLNLTCEAENRAGPGEKVTLDIEFPFSKIFLHNAEQQHHW  
 TrkA mouse LVNVTSDLNKNVTCWAENDVGRAEVSQVSVSFP-ASVHLGLAVEQHHW  
 TrkA human LANVTSDLNKNVTCWAENDVGRAEVSQVNVSFP-ASVQLHTAVEMHHW  
 \* \* : \* : \* : \* \* \* \* \* \* . \* . \* . \* : : : \* \* \* : \* \* : \* \* \*

TrkA trout CFFPKVDGNPEPTIRWLFNGSNLTEGLYTYTQFIPDSDD-GSVKHGCLFL  
 TrkA mouse CIPFSDVGDQPAPSLRWLFNGSVLNETSFIFTFLESALETMRHGCLRL  
 TrkA human CIPFSDVGDQPAPSLRWLFNGSVLNETSFIFTFLEPAAN-ETVRHGCLRL  
 \* : \* : \* \* \* \* \* \* : \* : \* \* \* \* \* \* . \* . \* . \* : : : \* \* \* \* \* \*

TrkA trout NKPTHLNGLYTIIVGN  
 TrkA mouse NQPTHVWNGNYTLAAN  
 TrkA human NQPTHVWNGNYTLAAN  
 \* : \* \* \* \* \* \* \* \* \* \* \* \* : : \* : \* : : : : \* \* \* \* \* \*

**B**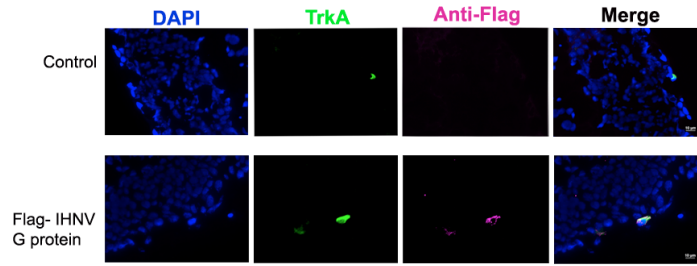**C**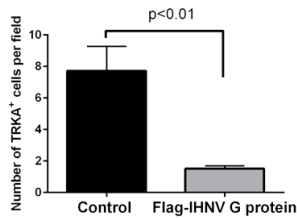**D**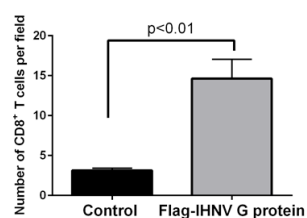**E**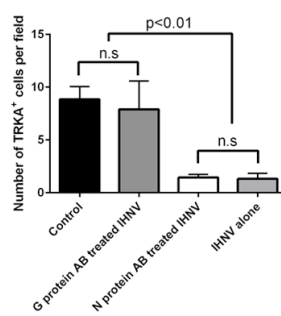**F**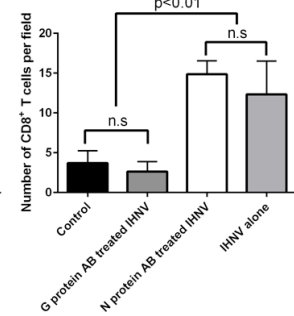

132

133

134 **Table S1. List of antibodies**

| Antibodies                                             | Vendor                   | Cat#             |
|--------------------------------------------------------|--------------------------|------------------|
| Trk A anti-rabbit polyclonal IgG                       | Santa Cruz Biotechnology | Cat# sc-118      |
| Caspase-3 anti-rabbit polyclonal IgG                   | Abcam                    | Cat# ab13847     |
| Normal rabbit IgG                                      | Santa Cruz Biotechnology | Cat# sc-3888     |
| Cy3 AffiniPure Goat anti-rabbit IgG (H+L)              | Jackson ImmunoResearch   | Cat# 111-165-144 |
| Phospho-p44/42 MAPK(ERK1/2) anti-rabbit polyclonal IgG | Cell signaling           | Cat# 9101        |
| FITC affiniPure donkey anti-rat IgG                    | Jackson ImmunoResearch   | Cat# 712-095-153 |
| FITC donkey anti-rabbit IgG                            | Jackson ImmunoResearch   | Cat# 115-165-003 |
| Rat anti-trout CD8 $\alpha$ polyclonal IgG             | (1)                      |                  |

|                                                                          |                        |                                                                       |
|--------------------------------------------------------------------------|------------------------|-----------------------------------------------------------------------|
| Rabbit anti-trout IgT                                                    | (2)                    |                                                                       |
| Mouse anti-trout IgM                                                     | (2)(1.14)              |                                                                       |
| Mouse anti-IHNV mAb                                                      | (3)                    | Pool of anti-IHNV mAbs<br>containing mAbs 1H8, 6A7, and 5AG (2 mg/ml) |
| Cy3 anti-mouse IgG                                                       | Jackson ImmunoResearch | Cat# 715-165-150                                                      |
| Peroxidase AffiniPure Donkey Anti-Rabbit IgG (H+L)                       | Jackson ImmunoResearch | Cat# 711-035-152                                                      |
| Mouse anti-FLAG M2 IgG                                                   | Sigma                  | Cat# F3165                                                            |
| Monoclonal ANTI-FLAG® M2-Cy3™ antibody produced in mouse                 | Sigma                  | Cat# A9594                                                            |
| murine mAb: anti-Infectious hematopoietic necrosis virus G (anti-IHNV G) | EVAg                   | Cat# 015A-01754                                                       |
| murine mAb: anti-Infectious hematopoietic necrosis virus N (anti-IHNV N) | EVAg                   | Cat# 015A-01753                                                       |

135

136

137 **Table S2. List of chemicals and reagents**

| <b>Chemicals</b>                                               | <b>Vendor</b>     | <b>Cat#</b>     |
|----------------------------------------------------------------|-------------------|-----------------|
| Ampicillin                                                     | Sigma Aldrich     | Cat# 69-52-3    |
| L-Serine                                                       | Acros Organics    | Cat# 132660250  |
| Ethyl 3-aminobenzoate methanesulfonate salt (MS-222)           | Sigma Aldrich     | Cat# 886-86-2   |
| Gallamine triethiodide                                         | Sigma Aldrich     | Cat# G8134-25G  |
| RNAlater                                                       | Ambion            | Cat# AM7021     |
| Paraformaldehyde                                               | Sigma Aldrich     | Cat# 30525-89-4 |
| Absolute Blue RTq-PCR SYBR Green ROX Mix                       | Thermo Scientific | Cat# AB4162B    |
| 2-(4-Amidinophenyl)-6-indolecarbamidine dihydrochloride (DAPI) | Sigma Aldrich     | Cat# 28718-90-3 |

|                                                |                   |                  |
|------------------------------------------------|-------------------|------------------|
| TRIzol™ Reagent                                | Thermo Scientific | Cat# 15596018    |
| Tyrphostin AG879                               | Sigma Aldrich     | Cat# 148741-30-4 |
| Tyrphostin AG879                               | Cayman Chemical   | Cat# 10793       |
| SuperScript™ III First-Strand Synthesis System | Thermo Scientific | Cat# 18080051    |
| Fluorescein isothiocyanate–dextran             | Sigma             | Cat# FD10S       |
| DMEM high glucose                              | Gibco             | Cat# 11995040    |
| Fetal bovine serum                             | Hyclone           | Cat# SH30071.03  |
| Penicillin-Streptomycin (10,000 U/mL)          | Gibco             | Cat# 15140122    |
| StartingBlock™ T20 (TBS) Blocking Buffer       | ThermoFisher      | Cat# 37543       |
| Metronidazole                                  | Sigma-Aldrich     | Cat# M3761       |
| PfuUltra II Fusion HS DNA Polymerase           | Agilent           | Cat# 600670      |
| Anti-FLAG M2 Magnetic Beads                    | Sigma             | Cat# M8823       |
| 3X-FLAG peptide                                | Sigma             | Cat# F4799       |
| Recombinant IHNV glycoprotein                  | This paper        | N/A              |
| Gallamine triethiodide                         | Sigma Aldrich     | Cat# G8134-25G   |
| Potassium chloride                             | Acros Organics    | Cat# 196770010   |
| Agar                                           | VWR               | Cat# J637        |

138

139 **Table S3. List of primer sequences.**

|                                                                                                                                                                  |
|------------------------------------------------------------------------------------------------------------------------------------------------------------------|
| <i>flag-ihnv</i> , primers<br>AATAGGTACCGCCATGGATTACAAGGATGACGACGATAAGGACACCACGATCACCCTCCGCTC (forward)<br>and AATACTCGAGCTAGTGGAGTGATTGAAGGTCTGAATGAG (reverse) |
| <i>Trout ef-1a</i> , primers CAACGATATCCGTCGTGGCA (forward) and ACAGCGAAACGACCAAGAGG (reverse)                                                                   |
| <i>Trout ck10</i> , primers GGCCAGATGGTGATGGACTGTG (forward) and GGTAGTGAAGACCACAGCGCTG (reverse)                                                                |
| <i>Trout Ifng</i> , primers GCTGTTCAACGGAAAACCTGTTT (forward) and TCACTGTCCTCAAACGTG (reverse)                                                                   |
| <i>Trout c-fos</i> , primers CGTCCTTCATCCCTACTGTTACC (forward) and TGTTCCATTTGCCTCTGC (reverse)                                                                  |
| <i>Trout tnfa</i> , primers GGGGACAACTGTGGACTGA (forward) and GAAGTTCTTGCCCTGCTCTG (reverse)                                                                     |
| <i>Trout ptgs2b</i> , primers CGTCCTTACAGAGGCTAGTGTGC (forward) GGTCCCTTCTTCAGAAGTACTG (reverse)                                                                 |
| <i>Trout tcra</i> , primers GCTGTTCAACGGAAAACCTGTTT (forward) and TATCAGCACGTTGAAAACGAT (reverse)                                                                |
| <i>Trout tcrb</i> , primers CTCCGCTAAGGAGTGTGAAGATAG (forward) and CAGGCCATAGAAGGTACTCTTAGC (reverse)                                                            |
| <i>Trout tcrg</i> , primers CACCCTGCTATGTCTGGCTA (forward) and CCATTCATGCTCCACAGAAC (reverse)                                                                    |

---

*Trout CCR7*, primers TTCACTGATTACCCCACAGACAATA (forward) and AAGCAGATGAGGGAGTAAAAGGTG (reverse)

---

*Trout IL10*, primers CTGCTGGACGAAGGGATTCTAC (forward) and GGCCTTTATCCTGCATCTTCTC (reverse)

---

*Trout granzyme A*, primers GGCCCACTGTACTGACATCAA (forward) and ACGCGACCTTTCACCTTACG (reverse)

---

*Trout perforin*, primers TCCTGCGGGTATTACAGCTATC (forward) and CACTGCTGTCTTGAATTCTCGG (reverse)

---

*ZF rps11*, primers CCCAGAGAAGCTATTGATGGC (forward) and CCCATGCTTCAGGGATGTGA (reverse)

---

*SVCV (N protein)*, primers ATCAGGCCGATTATCCTTCCA (forward) and AGATAAGCATTACATGCTGTAT (reverse)

---

*ZF ccl19-like*, primers GCCCACGTGATGCTGTAATA (forward) and ACAGCGTCTCTCGATGAACC (reverse)

---

IHNV (N proteins), primers GGTCGCCGAACCTTCTGGAA (forward) and GTAGGGCGCAGGTGAAGAGG (reverse)

---

140

## 141 **SI Methods:**

### 142 **Histology, transmission electron microscopy and immunofluorescence microscopy**

143 For transmission electron microscopy (TEM), the OO (N = 3) of rainbow trout that had received  
144 live attenuated IHNV IN 15 min prior to sampling were fixed overnight at 4 °C in 2.5 % (v/v)  
145 glutaraldehyde in PBS, then transferred to 1 % osmium tetroxide (w/v) in PBS for 2 h at 4 °C.  
146 After washing in PBS (3 times, 10 min), samples were dehydrated in a graded series of ethanol  
147 (10–100 %) through changes of propylene oxide. Samples were then embedded in Epon resin,  
148 sectioned and stained with uranyl acetate and lead citrate before being examined in a PHILIPS  
149 TECNAI 12 transmission-electron microscope. Additionally, semithin sections were stained with  
150 toluidine blue. Quantification of crypt neuron morphology in semithin sections was performed by  
151 two independent investigators by counting 10-20 crypt neurons per OO (N=3 per treatment) and  
152 scoring them as healthy or apoptotic/dead.

153 The conjugated antibodies used for immunostaining are listed in the **Table S1**. Trout OO and OB  
154 were snap frozen in OCT and 5- µm-thick cryosections were fixed in 4% paraformaldehyde for 3  
155 min, blocked for 15 min in T20 StartingBlock blocking solution (ThermoScientific) and labeled  
156 with rat anti-trout CD8α (1:50 dilution in PBT, PBS containing 0.01% Triton X-100 and 0.1%  
157 BSA), anti- pERK (1:50 dilution in PBT), anti-human TrkA (1:100 dilution in PBT) and rabbit  
158 anti-mouse caspase 3 (1:100 dilution in PBT) antibody for immunostaining. Nuclei were stained  
159 with DAPI. Samples were observed under a Nikon Ti or Zeiss confocal microscopes. To test the

160 permeability of BBB 15 min after nasal viral delivery, 50  $\mu$ l of FITC-conjugated 10 kDa dextran  
161 particles in PBS were injected i.v into 10 g rainbow trout (N = 6) 1 h before sampling. Trout then  
162 received IHNV or PBS IN and 15 min later, trout heads were snap frozen, embedded in OCT and  
163 cryosections were examined for fluorescence microscopy.

#### 164 **Electrophysiological recordings**

165 Rainbow trout were anesthetized in a solution of MS222 at 0.1 g/l, and then immobilized with an  
166 intra-muscular injection of gallamine triethiodide 3 mg/kg of body weight, in 0.9% saline. Fish  
167 were then secured in a V-shape Plexiglas stand partially inundated, whereby gills could be  
168 continuously irrigated with aeriated anesthetic solution of MS222 at 0.05 g/l. The olfactory rosette  
169 was surgically exposed and borosilicate electrodes, filled with a solution of 3 M KCL in 0.4% agar  
170 and connected to solid state electrodes with Ag/AgCl pellets, were placed between olfactory  
171 lamellae (signal electrode) and external skin (reference electrode). The olfactory epithelium was  
172 continuously irrigated with tap charcoal filtered water and the stimulus was released directly into  
173 the nose through a borosilicate tube. The olfactory responses generated after release of the stimuli  
174 for 4 s were filtered and amplified by a NeuroLog DC filter and pre-amplifier integrated by an  
175 Axon Digidata 1550B, and stored on a PC running Axioscope 10.6 software.

176 *Dose response experiments.* Stimuli were serially diluted from a 1:100 to 1:1000 000 from a stock  
177 solution, and applied to the nose to measure amplitude of the olfactory responses. These responses  
178 were blank subtracted (i.e. the response to tap charcoal filtered water, negative control) and  
179 normalized to those of *L*-serine at  $10^{-5}$  M. Normalized responses to filtered water had an average  
180 value of  $0.2 \pm 0.03$ . The IHNV stock consisted of live attenuated IHNV at  $2 \times 10^8$  PFU and culture  
181 medium stock was the supernatant of the vaccine after being centrifuged twice at 45,000 G for 60  
182 min at 5 °C. The supernatants were confirmed to be virus-free by RT-qPCR using IHNV N protein  
183 specific primers. Since the limit of the olfactory detection of IHNV is at a dilution of 1:100 000,  
184 we estimate that any remaining virus in the supernatant will be at a lower concentration than 1:100  
185 000 and will not activate specific IHNV olfactory receptors.

186 *Cross-adaptation experiments.* We identified dilutions of IHNV and medium that evoked the same  
187 EOG amplitude (called the 'unadapted' response). Then the olfactory rosette was continually  
188 exposed to IHNV solution at the concentration of the unadapted response at least 1 min, and the



189 response to a sample at double concentration of unadapted response IHNV was recorded (called  
190 the self-adapted control, SAC). After that, the response to a mixture IHNV and medium, both at  
191 same concentration that unadapted response, was recorded (Mix). Both measures, Mix and SAC,  
192 were then calculated as a percentage of the unadapted response. After adaptation, the olfactory  
193 rosette was flushed with charcoal filtered water for 20 min, and the process repeated using medium  
194 as the adapting solution and IHNV or the mixture IHNV and medium as stimuli. Half of the fish  
195 were adapted first to IHNV and the other half first to control.

196 *Inhibition curves.* Responses to 1:1000 to IHNV or medium were recorded (both showed similar  
197 amplitude in their olfactory responses). Then the olfactory rosette was continuously exposed to  
198 increasing concentrations of AG879 from  $10^{-9}$  M to  $10^{-5}$  M and, under each adapting concentration  
199 of the drug, it was measured the olfactory responses to 1:1000 of IHNV or medium. Responses  
200 were calculated as ratio between 1:1000 odorant after adaptation to drug solution and 1:1000  
201 odorant before adapted to drug. All graphs were produced with Sigma plot 11.0 and EC50  
202 concentrations were calculated using the Pharmacology module of the same program.

### 203 **Western blot, cell isolation and flow cytometry**

204 The conjugated antibodies used for western blot and Flow cytometry are listed in the **Table S1**.  
205 Olfactory Organ (OO), head kidney (HK), and olfactory bulb (OB) were extracted and prepared  
206 for Western blotting as explained elsewhere (4). Briefly, tissues were placed in 200  $\mu$ l of RIPA  
207 buffer and frozen at  $-80^{\circ}\text{C}$  until use. Samples were sonicated (10s intervals, 5 times), centrifuged  
208 (10,000 rpm, 15 min,  $4^{\circ}\text{C}$ ), and the supernatants collected. The total protein content of the  
209 supernatants was quantified using the Pierce 660nm Protein Assay (Thermo Scientific). After all  
210 samples were adjusted to the same concentration, 15  $\mu$ l of each sample were mixed with 15  $\mu$ l of  
211 Laemmli buffer under non-reducing conditions. Samples were boiled for 3 min at  $97^{\circ}\text{C}$  and  
212 resolved on 4–15% SDS-PAGE gels. Gels were run for 50 min at 120 V and transferred onto  
213 PVDF membranes. Membranes were blocked in PBS-T (PBS containing 0.05% Tween-20- and  
214 5% non-fat milk overnight at  $4^{\circ}\text{C}$ . Membranes were incubated with anti-TrkA (1:1000) or isotype  
215 control for 90 min, washed three times in PBS-T and then incubated for 60 min with HRP-anti-  
216 rabbit IgG (1:7500). Isotype controls consisted of samples incubated with rabbit IgG as primary  
217 antibody. Detection was performed using ECL Western Blotting Substrate. Immunoblots were

218 scanned using a ChemiDoc Touch Imaging System and band densitometry was analyzed with  
219 Image Lab Software.

220 Isolation of trout OO cells was carried out as explained elsewhere (5). Briefly, trout OO were  
221 obtained by means of mechanical agitation of both olfactory rosettes in DMEM medium  
222 (supplemented with 5% FBS, 100 U/ml penicillin and 100 µg/ml streptomycin) at 4 °C for 30 min.  
223 Leukocytes were collected, and the aforementioned procedure was repeated four times. Thereafter,  
224 the OO pieces were treated with PBS (containing 0.37 mg/ml EDTA and 0.14 mg/ml dithiothreitol  
225 (DTT)) for 30 min followed by enzymatic digestion with collagenase type IV (0.15 mg/ml) for 2  
226 h at 20 °C. All cell fractions obtained the OO following the mechanical and enzymatic treatments  
227 were pooled, washed with modified DMEM. OB microvessels were extracted then 40 µl of DMEM  
228 containing heparin were added to the cavity to collect the remaining blood from the microvessels.  
229 This step was repeated twice. Cells were isolated by forcing the tissue through a 100-µm pore  
230 nylon cell strainer and washed in DMEM three times. Cell suspensions were counted in a  
231 haemocytometer and stained with CD8α, IgM, IgT, pERK or TrkA antibodies as explained  
232 elsewhere (3). For pERK and TrkA flow cytometry staining, cells were stained intracellularly by  
233 first fixing for 10 min at room temperature in 2% PFA followed washing in Perm/Wash buffer  
234 (BD). A total of 30,000 cells were recorded using an Attune NxT flow cytometer. The percentage  
235 and total numbers of CD8α<sup>+</sup>, IgM<sup>+</sup> and IgT<sup>+</sup> cells were quantified within the lymphocyte gate using  
236 their FSC/SSC profile. pERK<sup>+</sup> cells were quantified using a neuronal cell gate based on their  
237 FSC/SSC profile.

238

### 239 **Gene expression analysis by real-time quantitative PCR**

240 Total RNA from OO and OB samples were collected and placed in 1 ml TRIzol (**Table S2**) for  
241 RNA extraction according to the manufacturer's instructions. cDNA synthesis was performed as  
242 explained elsewhere (4). The resultant cDNA was stored at -20 °C. The expression of *ptgs2b*, *ifng*,  
243 *tnfa*, *ck10* (CCL19-like) and *c-fos* for rainbow trout, zebrafish *ccl19-like*, IHNV N protein and  
244 SVCV N protein were measured by RT-qPCR using specific primers (**Table S3**). The RT-qPCR  
245 was performed using 3 µl of a diluted cDNA template as described in (6). The relative expression  
246 level of the genes was determined using the Pfaffl method (7) as previously described (6).

### 247 **Recombinant IHNV G protein production**

248 IHNV lacking the predicted C-terminal transmembrane domain (amino acids 1-459) was cloned  
249 into pcDNA3.1 with an N-terminal FLAG epitope using 5'-KpnI and 3'-XhoI restriction sites and  
250 sequenced confirmed. Recombinant IHNV was purified using the FreeStyle 293 Expression  
251 System (Invitrogen). 293-F cells were maintained as 30mL suspension stocks in 293 Expression  
252 Medium supplemented with 10% FBS. Cells were grown at 37°C with 8% CO<sub>2</sub> with constant  
253 shaking at 125 rpm. For transfection with pcDNA3.1-FLAG:IHNV, cells were scaled to 5x30mL  
254 stocks and each transfected using 293-Fectin reagent according to manufacturer's protocol  
255 (Invitrogen). Briefly, cells were passaged as ~1x10<sup>6</sup>/mL in 30 mL suspension stocks and each  
256 transfected with 30 µg of pcDNA3.1-FLAG:IHNV plasmid. Cells were then allowed to grow at  
257 37°C with 8% CO<sub>2</sub> with constant shaking at 125rpm for 5 days.

258 FLAG:IHNV was purified using affinity chromatography. Cells were harvested and lysed in lysis  
259 buffer (50 mM Tris pH=8, 300 mM NaCl, 1mM DTT, protease inhibitors) using 20-30 passes  
260 through a 23G needle. Cell lysates were clarified and the supernatant (~10mL) was incubated with  
261 1mL of Anti-FLAG M2 Magnetic Bead slurry (Sigma) for 3 h at 4°C and constant rocking. Beads  
262 were separated using a magnetic stand and washed 5 times with lysis buffer. FLAG:IHNV was  
263 eluted using 3X FLAG Peptide at a concentration of 100 µg/mL in lysis buffer (Sigma). The eluted  
264 sample was extensively dialyzed overnight against storage buffer (20 mM Tris pH=8, 150 mM  
265 NaCl, 2 mM DTT). The dialyzed FLAG:IHNV was concentrated using a VivaSpin-20  
266 concentrator and stored at -80°C until use. Purity and size of the recombinant protein generated  
267 was confirmed by western blotting using anti-FLAG antibody (Sigma) (See SI Appendix, Figure  
268 S6B). Recombinant protein stocks were diluted in PBS for *in vivo* nasal delivery as explained  
269 below.

## 270 **DNA constructs and generation of transgenic zebrafish larvae**

271 Three kb of the upstream regulatory sequence of the *ora4* gene, which includes its 5'UTR  
272 (Ensembl accession number ENSDARG00000078223) was amplified using PfuUltra II Fusion HS  
273 DNA Polymerase, the primers 5'-aaggtaccgtgaatgcgtgtgtgatgac-3 and 5'-  
274 aaaggatccgctgaagatgctccagagtcc-3, and zebrafish larval genomic DNA as template. The amplicon  
275 was digested with *KpnI/BamHI*, cloned in the p5E-MCS vector (#228) of the Tol2kit and the  
276 *ora4::Gal4VP16* construct were then generated by MultiSite Gateway assemblies using LR

277 Clonase II Plus according to standard protocols and using Tol2kit vectors described previously  
278 (8).

279 The lines *Tg(ora4::Gal4VP16)<sup>ums4</sup>* were generated by microinjecting 0.5-1 nl into the yolk sac of  
280 one-cell-stage embryos a solution containing 100 ng/ $\mu$ l *ora4::Gal4VP16* construct and 50 ng/ $\mu$ l  
281 Tol2 RNA in microinjection buffer (0.5x Tango buffer and 0.05 % phenol red solution) using a  
282 pneumatic microinjector.

### 283 **Cell ablation and live imaging of zebrafish larvae**

284 The lines *Tg(UAS-E1b:nfsb-mCherry)<sup>c264</sup>* and *Tg(ora4::Gal4VP16)<sup>ums4</sup>* were crossed. Their  
285 offspring were treated at 48 h post-fertilization (hpf) for 24 h with 12 mM metronidazole and kept  
286 in dark (9). Images were first obtained at 48 hpf as described below. Thereafter, starting from 72  
287 hpf the prodrug was removed, and larvae imaged once a day up to 120 hpf to confirm the ablation  
288 of *ora4*<sup>+</sup> crypt neurons.

289 For live imaging, larvae were anesthetized in tricaine as previously described (10). Images were  
290 captured with an epifluorescence MZ16FA stereomicroscope (Leica) equipped with green and red  
291 fluorescent filters while animals were kept constantly at 28.5°C.

### 292 **Viral challenge in zebrafish**

293 The SVCV isolate 56/70 was propagated in EPC cells and titrated in 96-well plates. Thirty 72 hpf  
294 zebrafish larvae per group in triplicate were challenged for 24 h at 25°C in disposable Petri dishes  
295 by immersion in 10<sup>8</sup> TCID<sub>50</sub>/fish SVCV. After challenge, the remaining fish in each group were  
296 transferred to fresh plates containing egg water and monitored every 12 h over a 6-day period to  
297 score mortality (11).

298

299

300

301

302

303

304 **Appendix SI References:**

305

- 306 1. Takizawa F, *et al.* (2011) The expression of CD8 $\alpha$  discriminates distinct T cell subsets in teleost  
307 fish. *Dev. Comp. Immunol.* 35(7):752-763.
- 308 2. Zhang Y-A, *et al.* (2010) IgT, a primitive immunoglobulin class specialized in mucosal immunity.  
309 *Nat. Immunol.* 11(9):827-835.
- 310 3. Sepahi A, *et al.* (2016) Tissue microenvironments in the nasal epithelium of rainbow trout  
311 (*Oncorhynchus mykiss*) define two distinct CD8 $\alpha$ + cell populations and establish regional  
312 immunity. *J. Immunol.* 197(11):4453-4463.
- 313 4. Sepahi A, Cordero H, Goldfine H, Esteban M $\acute{A}$ , & Salinas I (2016) Symbiont-derived sphingolipids  
314 modulate mucosal homeostasis and B cells in teleost fish. *Sci. Rep.* 6:39054.
- 315 5. Tacchi L, *et al.* (2014) Nasal immunity is an ancient arm of the mucosal immune system of  
316 vertebrates. *Nat. Commun.* 5:6205.
- 317 6. Tacchi L, Larragoite E, & Salinas I (2013) Discovery of J Chain in African Lungfish (*Protopterus*  
318 *dolloi*, *Sarcopterygii*) Using High Throughput Transcriptome Sequencing: Implications in Mucosal  
319 Immunity. *PLoS One* 8(8):e70650.
- 320 7. Pfaffl MW (2001) A new mathematical model for relative quantification in real-time RT-PCR.  
321 *Nucleic Acids Res.* 29(9):2002-2007.
- 322 8. Kwan KM, *et al.* (2007) The Tol2kit: a multisite gateway-based construction kit for Tol2  
323 transposon transgenesis constructs. *Dev. Dyn.* 236(11):3088-3099.
- 324 9. Davison JM, *et al.* (2007) Transactivation from Gal4-VP16 transgenic insertions for tissue-specific  
325 cell labeling and ablation in zebrafish. *Dev. Biol.* 304(2):811-824.
- 326 10. Galindo-Villegas J, Garca-Moreno D, de Oliveira S, Meseguer J, & Mulero V (2012) Regulation of  
327 immunity and disease resistance by commensal microbes and chromatin modifications during  
328 zebrafish development. *Proc. Natl. Acad. Sci. U. S. A* 109(39):E2605-E2614.
- 329 11. Lopez-Munoz A, Roca FJ, Sepulcre MP, Meseguer J, & Mulero V (2010) Zebrafish larvae are  
330 unable to mount a protective antiviral response against waterborne infection by spring viremia  
331 of carp virus. *Dev. Comp. Immunol.* 34(5):546-552.

332
